# Supplementary material for: Controlling the formation of self-assembled Cu–Sn sulfide with a hoya-like structure for its electrochemical performance
Source: Royal Society of Chemistry journal article supplement (doi:10.1039/c9nj02544h), 2019-01-01
Supplement: c9nj02544h1.pdf [file c9nj02544h1.pdf]

## Support information

### Controlling formation of self-assembled Cu-Sn sulfide with hoya-like structure for their electrochemical performance

Xiaojuan Feng <sup>a,b\*</sup>, Zhongai Hu <sup>a\*</sup>, Yanlong Shi<sup>b</sup>, Guangyue Zhao<sup>b</sup>, Yi Zhou<sup>a</sup>,  
Xiaotong Wang<sup>a</sup>, Lijie Hou<sup>a</sup>

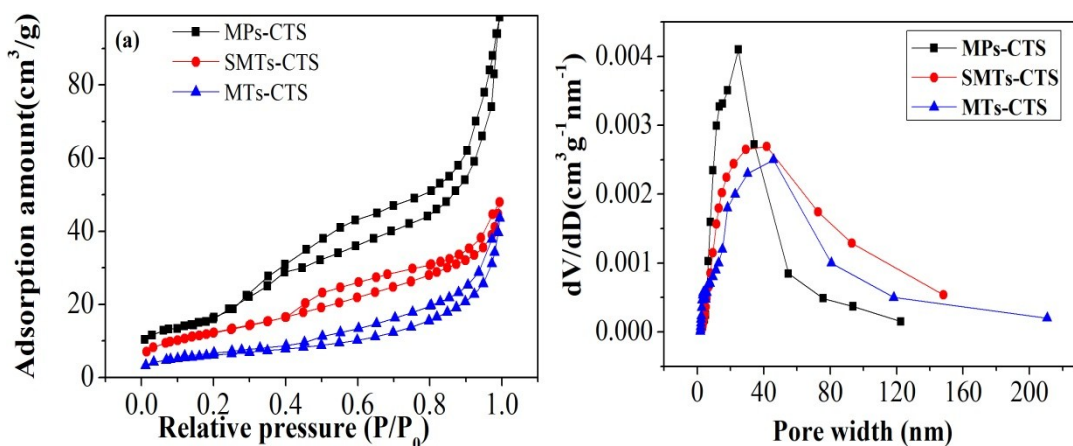

**Fig. S1.** (a) Nitrogen adsorption-desorption isotherm and (b) pore size distribution plot of MTs-CTS, SMTs-CTS and MPs-CTS

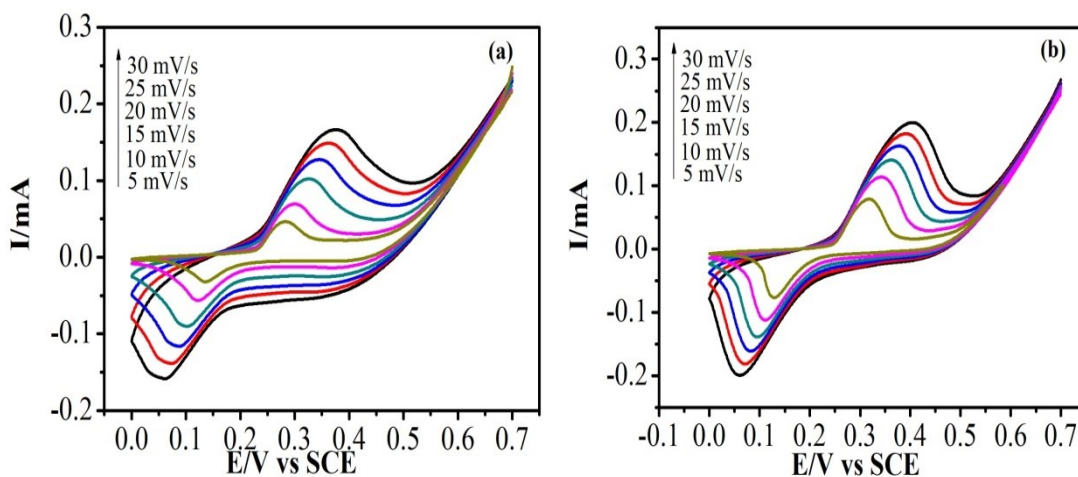

**Fig.S2.** CV curves of MTs-CTS (a) and SMTs-CTS (b) at various scan rates

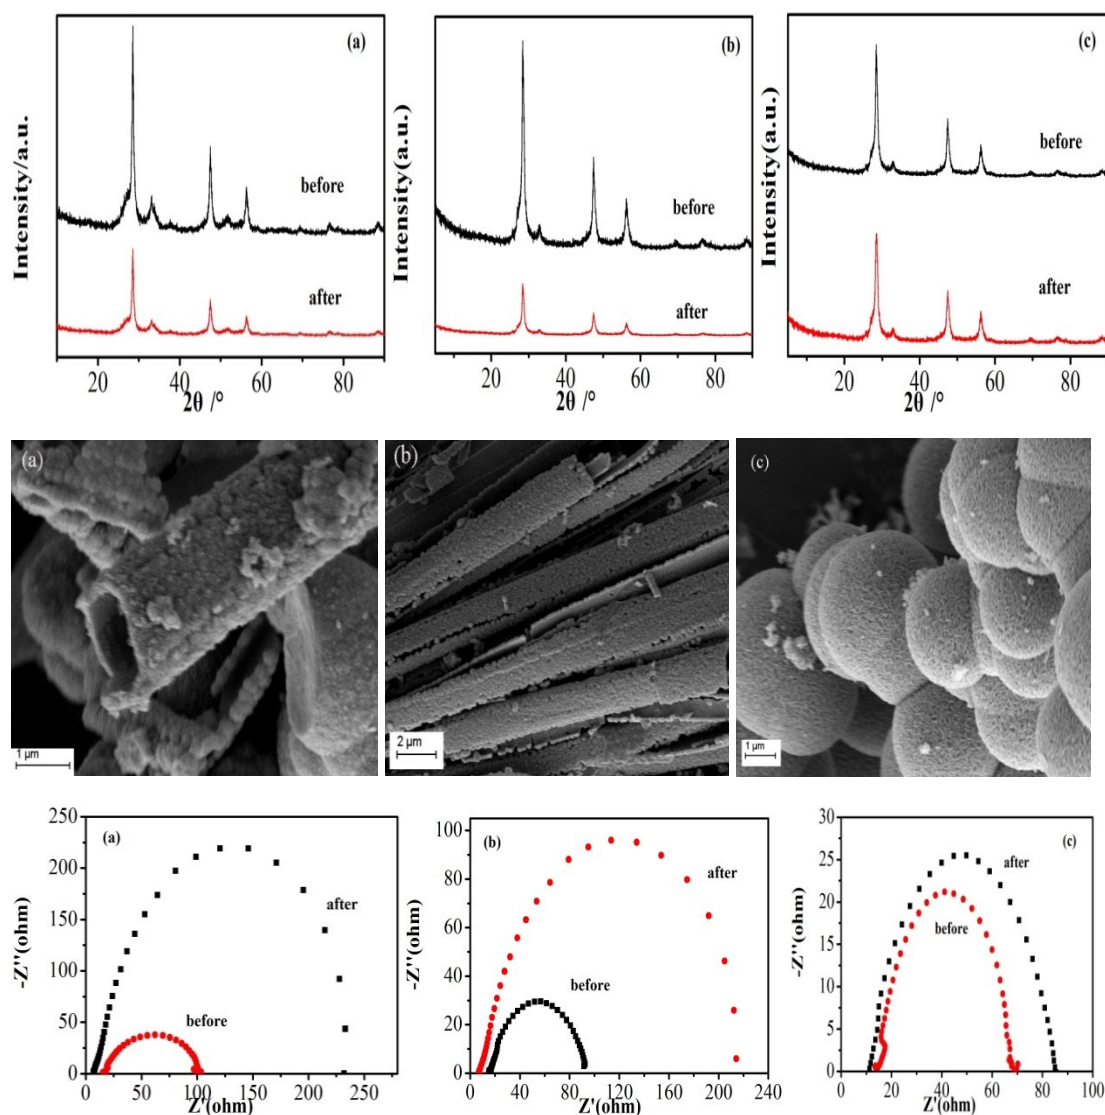

**Fig.S2** The XRD , SEM and EIS of MTs-CTS, SMTs-CTS and MPs-CTS before and after long cycling electrochemical tests

**Table S1.** Comparison of SC performance of the prepared samples with reported metallic sulfide

| Electrode           | Specific capacitance | Current density       | Retention | cycles | Ref |
|---------------------|----------------------|-----------------------|-----------|--------|-----|
| CF-SnS <sub>2</sub> | 524.5F/g             | 0.08A/g               | 68%       | 1000   | [1] |
| FL-SnS <sub>2</sub> | 431.82F/g            | 1A/g                  | 90%       | 2000   | [2] |
| 2DCoSNC             | 360.1F/g             | 1.5A/g                | 90%       | 2000   | [3] |
| CuS                 | 49.8mA/g             | 1A/g                  | 80.5%     | 1500   | [4] |
| CuMoS               | 127F/g               | 1.5mA/cm <sup>2</sup> | 92%       | 3000   | [5] |

|                                         |           |         |       |      |           |
|-----------------------------------------|-----------|---------|-------|------|-----------|
| Cu <sub>2</sub> SnS <sub>3</sub>        | 406C/g    | 1A/g    | 60%   | 2000 | [6]       |
| Cu <sub>4</sub> SnS <sub>4</sub>        | 704F/g    | 1A/g    | 89.9% | 1000 | [7]       |
| Cu <sub>2</sub> ZnSnS <sub>4</sub> /RGO | 591F/g    | 0.25A/g | 80.6% | 1000 | [8]       |
| MTs- CTS                                | 74.8F/g   | 1A/g    | 74.2% | 2000 | This work |
| SMTs-CTS                                | 89.1F/g   | 1A/g    | 89.1% | 2000 | This work |
| MPs-CTS                                 | 1134.2F/g | 1A/g    | 94.2% | 2000 | This work |

**Table S2.** Comparison of HER performance of the prepared samples with reported electrocatalytic

| Electrode                        | Electrolyte                         | Overpotential | Tafel slope | Ref       |
|----------------------------------|-------------------------------------|---------------|-------------|-----------|
| CuS                              | 0.5M H <sub>2</sub> SO <sub>4</sub> | 449           | 171         | [9]       |
| SnS                              | 0.5M H <sub>2</sub> SO <sub>4</sub> | -             | 266         | [10]      |
| MoS <sub>2</sub>                 | 0.5M H <sub>2</sub> SO <sub>4</sub> | 350           | 138         | [11]      |
| CoS <sub>2</sub>                 | 0.5M H <sub>2</sub> SO <sub>4</sub> | 206           | 71          | [12]      |
| NiS                              | 0.5M HCl                            | 560           | 182         | [13]      |
| Cu <sub>2</sub> SnS <sub>3</sub> | 0.5M H <sub>2</sub> SO <sub>4</sub> | 749           | 127         | [14]      |
| Cu <sub>3</sub> SnS <sub>3</sub> | 0.5M H <sub>2</sub> SO <sub>4</sub> | 330           | 98          | [15]      |
| Cu <sub>4</sub> SnS <sub>4</sub> | 0.5M H <sub>2</sub> SO <sub>4</sub> | 358           | 110         | [15]      |
| CTS-MT                           | 0.5M H <sub>2</sub> SO <sub>4</sub> | 461           | 182         | This work |
| CTS-SMT                          | 0.5M H <sub>2</sub> SO <sub>4</sub> | 435           | 84          | This work |
| CTS-MP                           | 0.5M H <sub>2</sub> SO <sub>4</sub> | 301           | 78          | This work |

## Notes and references

- 1 R. K Mishra, G. W Baek, K Kim, H. I Kwon, S. H Jin, Appl. Surf. Sci., 2017, **425**,

923-931.

2. N. Parveen, S. A. Ansari, H. R. Alamri, M. O. Ansari, Z. Khan, M. H. Cho, *ACS Omega.*, 2018, **3**, 1581-1588.
- 3 M. Jayalakshmi, M. M. Rao, B. M. Choudary, *Electrochem. Commun.*, 2004, **6**, 1119.
- 4 J. Bao, Z. L. Wang, W. J. Liu, L. Xu, F.C. Lei, J. F. Xie, Y. Zhao, Y. P. Huang, M. L. Guan, H. M. Li, *J. Alloy. Compd.*, 2018, **764**, 565-573.
- 5 S. Sahoo, K. Krishnamoorthy, P. Pazhamalai, V. K. Mariappan, S. J. Kim, *Int. J. Hydrogen Energy.*, 2018, **43**, 12222-12232.
- 6 C. Wang, H. Tian, J. Jiang, T. Zhou, Q. Zeng, X. R. He, P. Huang, Y. Yao, *ACS Appl. Mater. Interfaces.*, 2017, **9**, 26038-26044
- 7 A. C. Lokhande, A. Patil, A. Shelke, P. T. Babar, M. G. Gang, V. C. Lokhande, D. S. Dhawale, C. D. Lokhande, J. H. Kim, *Electrochi. Acta.*, 2018, **284**, 80-88.
- 8 Q. Tang, H. Shen, H. Yao, W. Wang, Y. Jiang, C. Zheng, *Ceram. Int.*, 2016, **42**, 10452-10458.
- 9 M. Basu, R. Nazir, P. Fageria, S. Pande, *Sci. Rep.*, 2016, **6**, 34738.
- 10 S. S. Shinde, A. Sami, D. H. Kim, J.-H. Lee, *Chem. Commun.*, 2015, **51**, 15716-15719.
- 11 S. J Xu, Z.Y. Lei, P. Y. Wu, *J. Mater. Chem. A.*, 2015, **3**, 16337-16347.
- 12 Y. Guo, C. Shang, E. Wang, *J. Mater. Chem. A.*, 2017, 765-774
- 13 I. Hod, P. Deria, W. Bury, J. E. Mondloch, C.W. Kung, M. So, M.D. Sampson, A. W. Peters, C. P. Kubiak, O. K. Farha, J. T. Hupp, *Nat. Commun.*, 2015, **6**, 8304.

- 14 V. Maheskumar, P. Gnanaprakasam, T. Selvaraju, B. Vidhya, *J. Electroanal. Chemi.*, 2018, **8**, 345-350.
- 15 V. Maheskumar, P. Gnanaprakasam, T. Selvaraju, B. Vidhya, *Int. J. Hydrogen. Energy.*, 2018, **43**, 3967-3975
